# Supplementary material
Source: PubMed Central journal article supplement (PMC7666076)
Supplement: NIHMS1630484-supplement-3.pdf [file NIHMS1630484-supplement-3.pdf]

### Supplementary Figure 1. Uncropped EMSA gel data

All copies of the original high-resolution image scans are available at:

[https://figshare.com/projects/DNA\\_mismatches\\_reveal\\_conformational\\_penalties\\_in\\_protein-DNA\\_recognition/83663](https://figshare.com/projects/DNA_mismatches_reveal_conformational_penalties_in_protein-DNA_recognition/83663)

Computed Kd values for all replicates are available in **Supplementary Table 3**. Average Kd values and standard deviations are available in **Supplementary Table 3** and shown in **Figure 1f** (p53 and GR EMSA) and **Extended Data Figure 3e** (p53 and GR EMSA).

**Gels used to infer p53 Kd for wild-type site**  
(replicates 1-2, rows 3-4 in Supplementary Table 3)

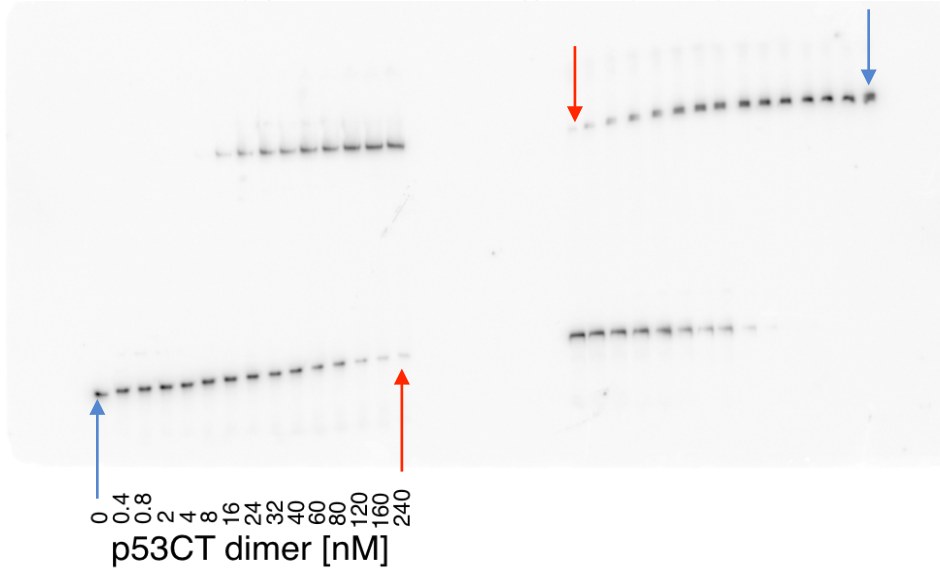

**Gels used to infer p53 Kd for wild-type site**  
(replicates 3-4, rows 5-6 in Supplementary Table 3)

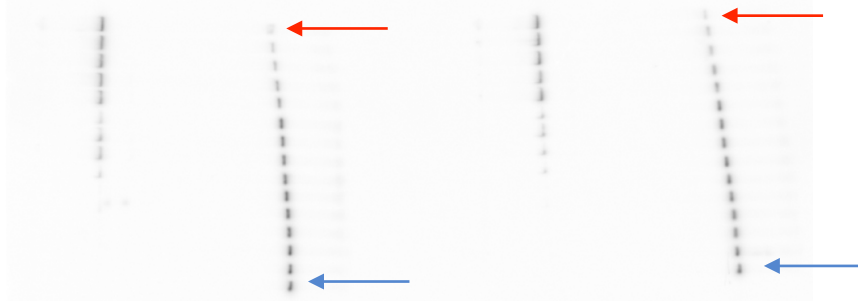

**Gels used to infer p53 Kd for Wild-type site**  
(replicates 5-6, rows 7-8 in Supplementary Table 3)

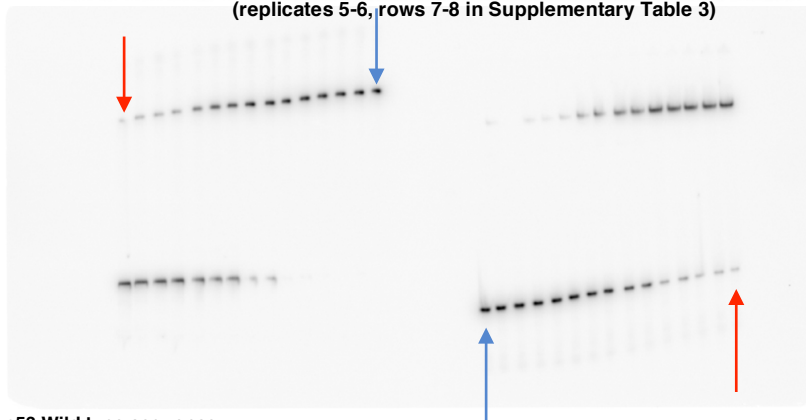

**p53 Wild type sequence.**

Protein concentration: 0,0.4,0.8,2,4,8,16,24,32,40,60,80,120,160,240 [nM] (Blue arrow 0nM, and Red arrow 240nM)

Original high quality image scans:

[https://figshare.com/articles/figure/p53\\_EMSA\\_gels/12568691](https://figshare.com/articles/figure/p53_EMSA_gels/12568691)

File names: WT\_CT20-1\_b1e1\_8.4.19.tif , WT\_CT20-2\_b1e2\_11.4.19.tif , WT\_CT20-2\_b1e3\_14.4.19.tif

Gels used to infer p53 Kd for the T-A variant site  
(replicates 1-2, rows 21-22 in Supplementary Table 3)

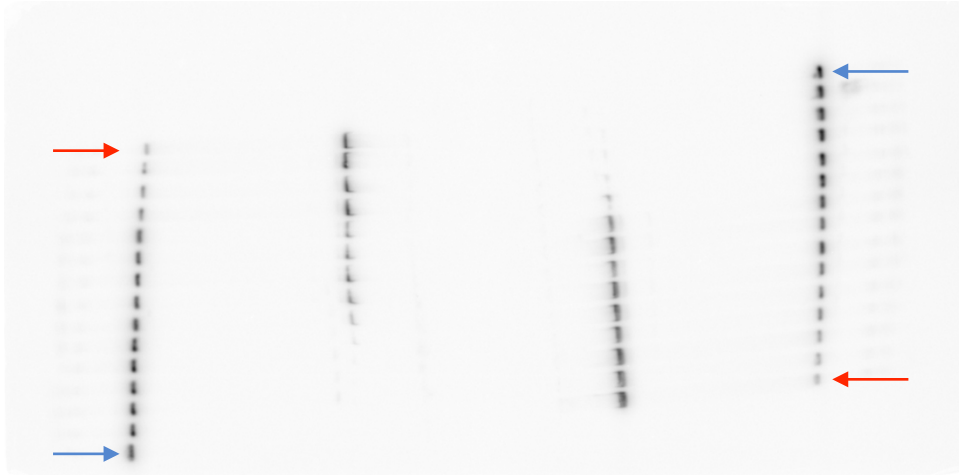

Gels used to infer p53 Kd for the T-A variant site  
(replicates 3-4, rows 23-24 in Supplementary Table 3)

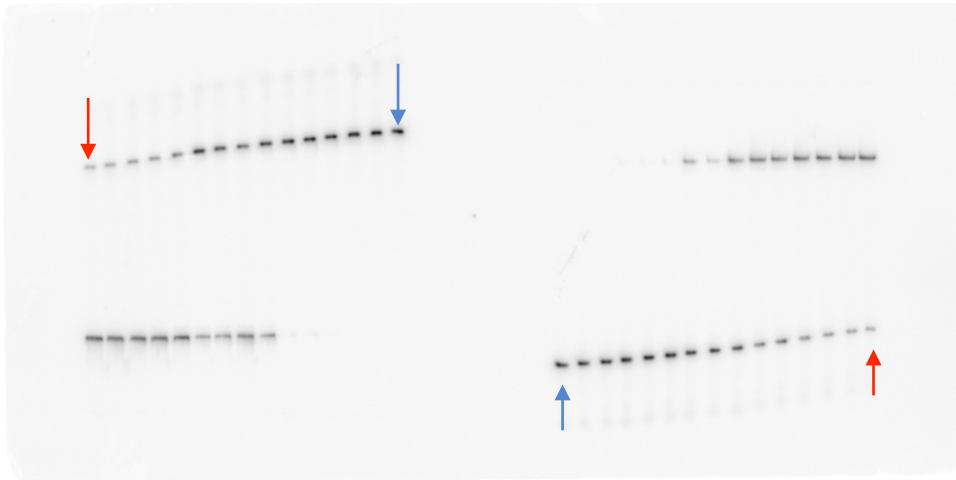

Gels used to infer p53 Kd for the T-A variant site  
(replicates 5-6, rows 25-26 in Supplementary Table 3)

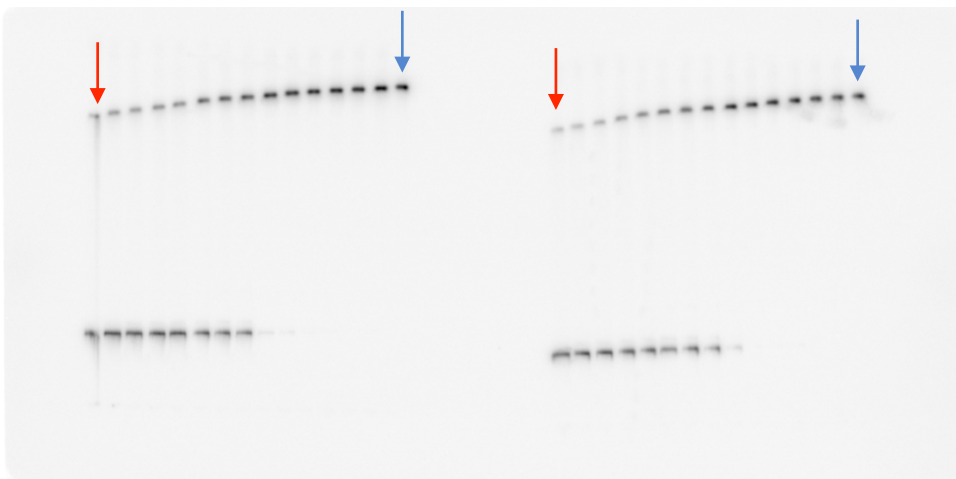

**p53 T-A variation.**

Protein concentration: 0,0.4,0.8,2,4,8,16,24,32,40,60,80,120,160,240 [nM] (Blue arrow 0nM, and Red arrow 240nM)

Original high quality image scans:

[https://figshare.com/articles/figure/p53\\_EMSA\\_gels/12568691](https://figshare.com/articles/figure/p53_EMSA_gels/12568691)

File names: Var\_T-A\_CT20-2\_b1e1\_17.4.19.tif , Var\_T-A\_CT20-2\_b1e2\_21.4.19.tif , Var\_T-A\_CT20-2\_b1e3\_23.4.19.tif

Gels used to infer p53 Kd for the C-G variant site  
(replicates 1-2, rows 39-40 in Supplementary Table 3)

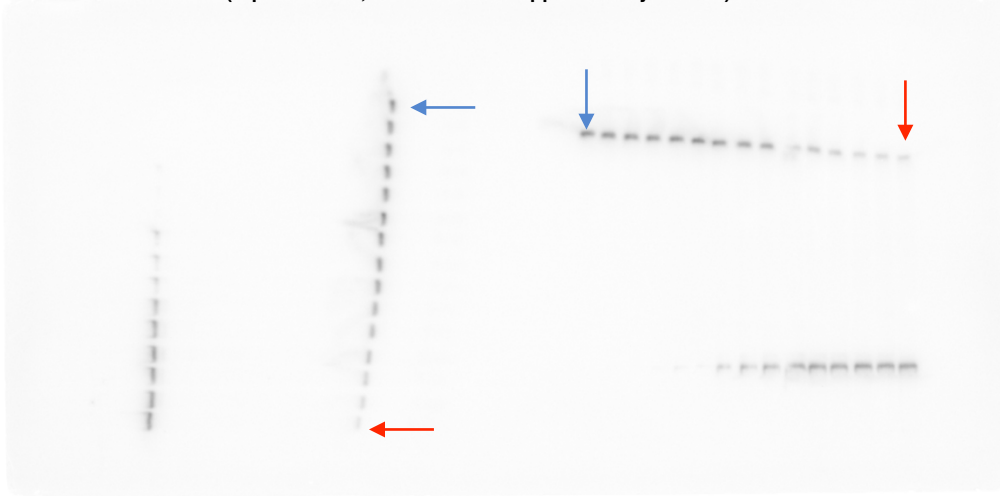

Gels used to infer p53 Kd for the C-G variant site  
(replicates 3-4, rows 41-42 in Supplementary Table 3)

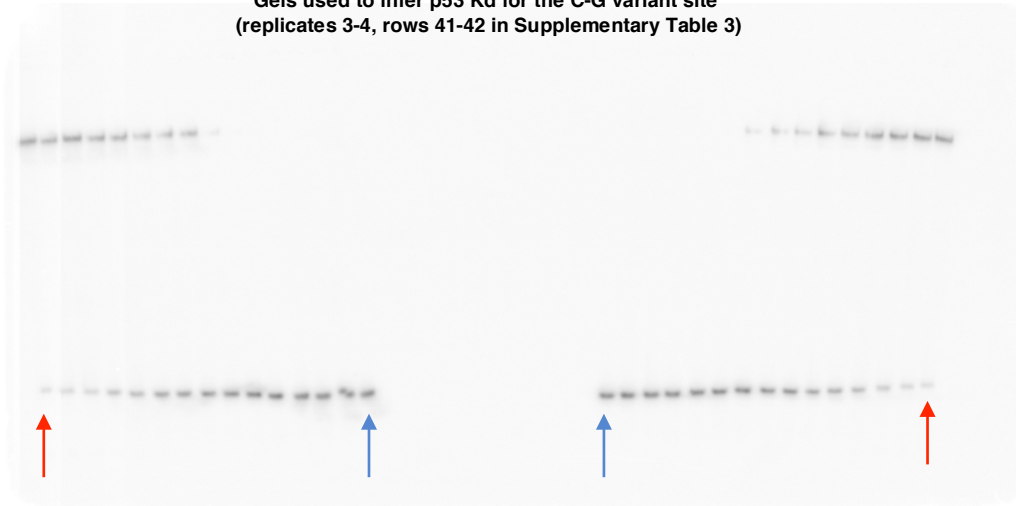

Gels used to infer p53 Kd for the C-G variant site  
(replicates 5-6, rows 43-44 in Supplementary Table 3)

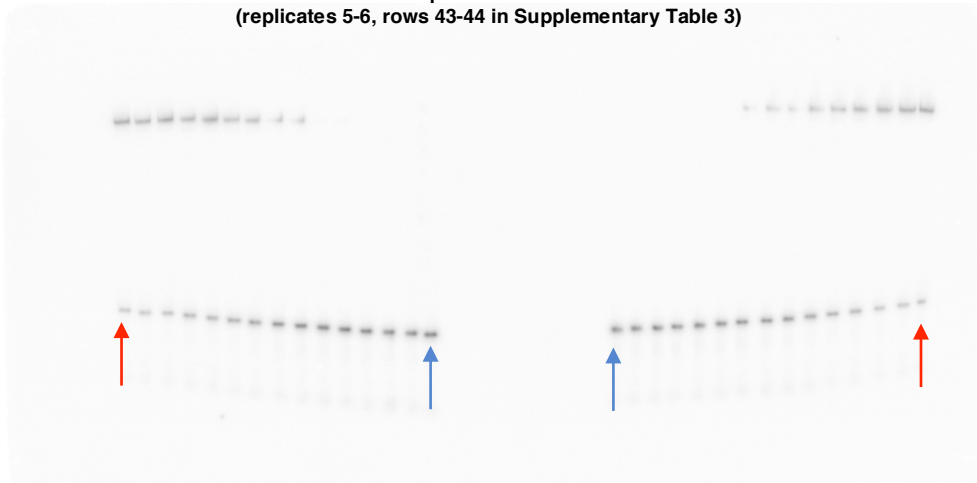

**p53 C-G variation.**

Protein concentration: 0,0.4,0.8,2,4,8,16,24,32,40,60,80,120,160,240 [nM] (Blue arrow 0nM, and Red arrow 240nM)

Original high quality image scans:

[https://figshare.com/articles/figure/p53\\_EMSA\\_gels/12568691](https://figshare.com/articles/figure/p53_EMSA_gels/12568691)

File names: Var\_C-G\_CT20-2\_b1e1\_18.4.19.tif , Var\_C-G\_CT20-2\_b1e2\_22.4.19.tif , Var\_C-G\_CT20-2\_b1e3\_28.4.19.tif

Gels used to infer p53 Kd for the C-G&G-C variant site  
(replicates 1-2, rows 45-46 in Supplementary Table 3)

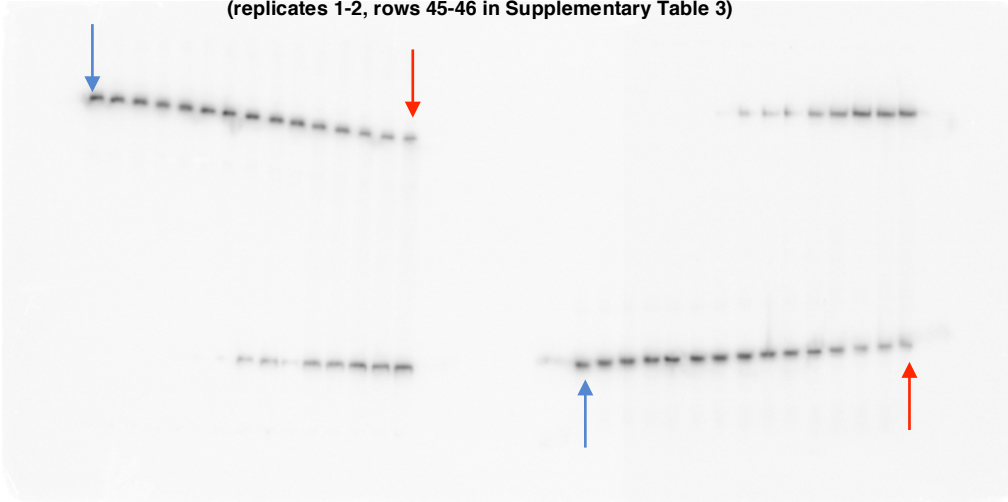

Gels used to infer p53 Kd for the C-G&G-C variant site  
(replicates 3-4, rows 47-48 in Supplementary Table 3)

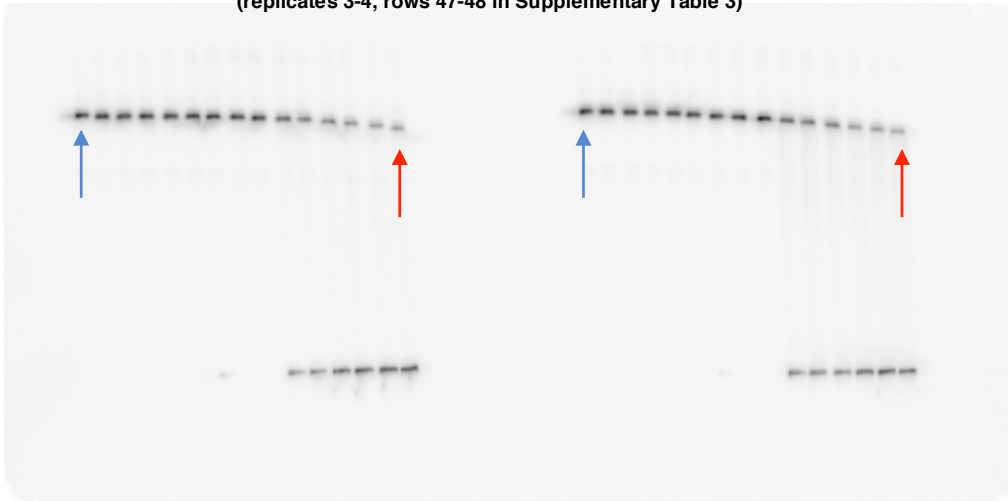

Gels used to infer p53 Kd for the C-G&G-C variant site  
(replicates 5-6, rows 49-50 in Supplementary Table 3)

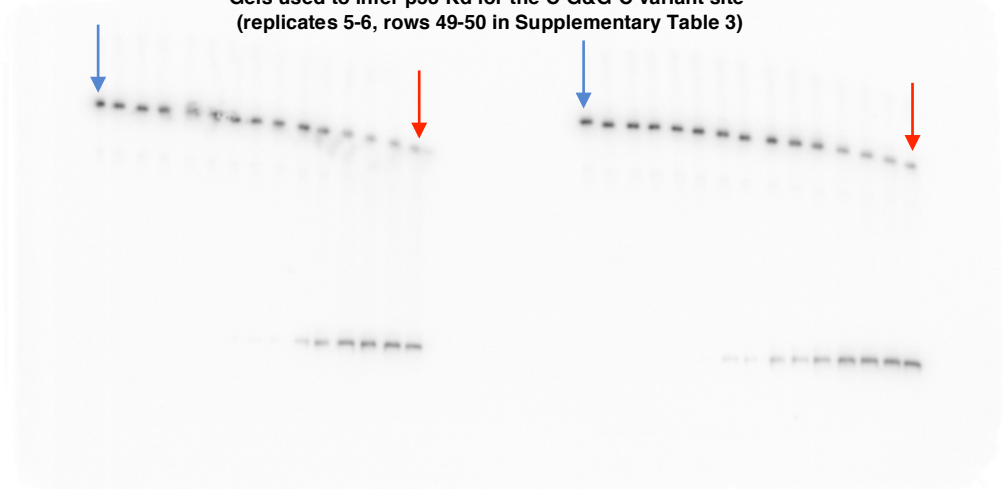

**p53 C-G + G-C variation.**

Protein concentration: 0,0.4,0.8,2,4,8,16,24,32,40,60,80,120,160,240 [nM] (Blue arrow 0nM, and Red arrow 240nM)

Original high quality image scans:

[https://figshare.com/articles/figure/p53\\_EMSA\\_gels/12568691](https://figshare.com/articles/figure/p53_EMSA_gels/12568691)

File names: Var\_C-G G-C\_CT20-4\_b2e1\_15.7.19.tif , Var\_C-G G-C\_CT20-4\_b2e2\_16.7.19.tif , Var\_C-G G-C\_CT20-4\_b2e3\_17.7.19.tif

Gels used to infer p53 Kd for the T-T mismatch site  
(replicates 3-4, rows 17-18 in Supplementary Table 3)

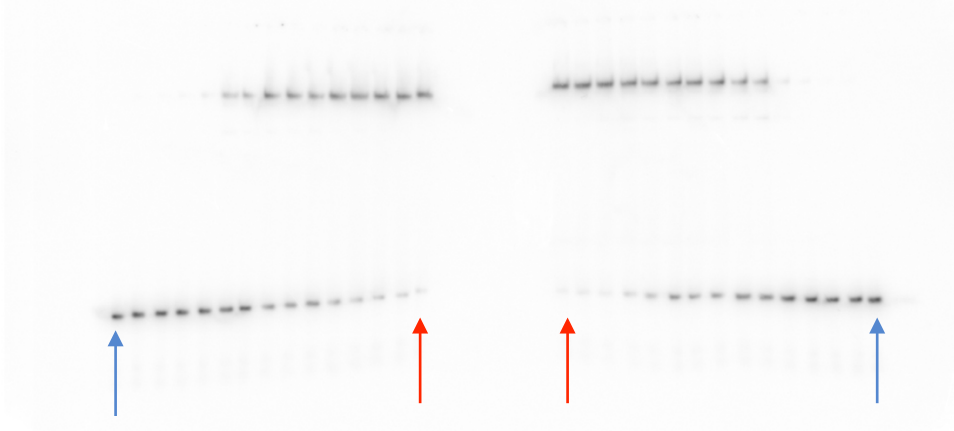

Gels used to infer p53 Kd for the T-T mismatch site  
(replicates 5-6, rows 19-20 in Supplementary Table 3)

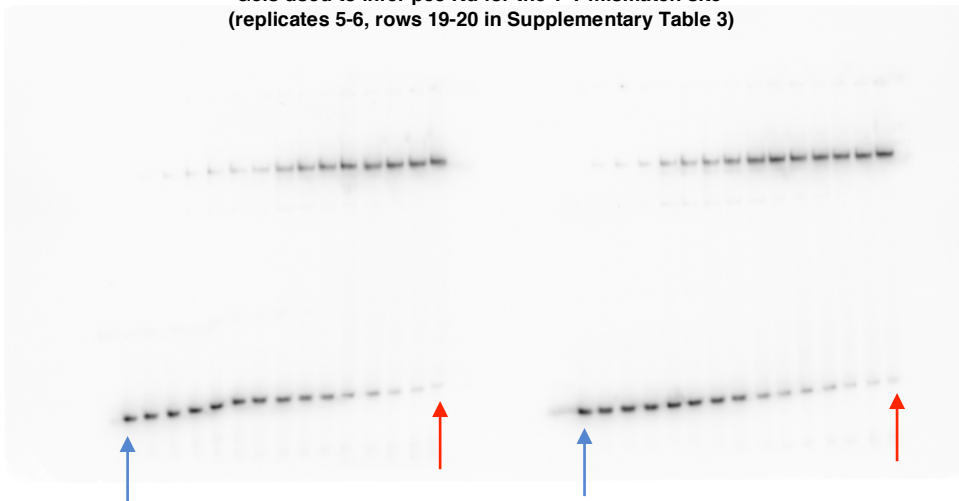

Gels used to infer p53 Kd for the T-T mismatch site  
(replicates 1-2, rows 15-16 in Supplementary Table 3)

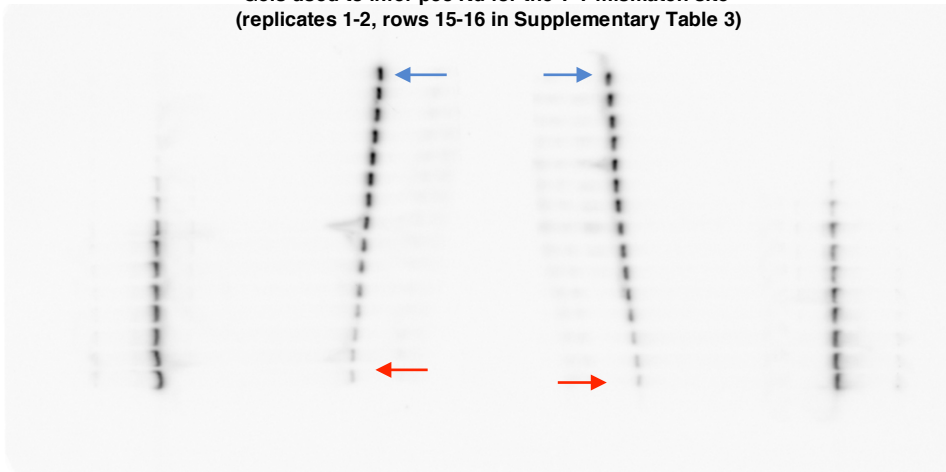

**p53 T-T mismatch**

Protein concentration: 0,0.4,0.8,2,4,8,16,24,32,40,60,80,120,160,240 [nM] (Blue arrow 0nM, and Red arrow 240nM)

Original high quality image scans:

[https://figshare.com/articles/figure/p53\\_EMSA\\_gels/12568691](https://figshare.com/articles/figure/p53_EMSA_gels/12568691)

File names: MM\_T.T\_CT20-2\_b1e3\_14.4.19.tif , MM\_T.T\_CT20-2\_b1e4\_16.4.19.tif , MM-T.T\_CT20-1\_b1e2\_9.4.19.tif

Gels used to infer p53 Kd for the two T-T mismatch site  
(replicates 3-4, rows 11-12 in Supplementary Table 3)

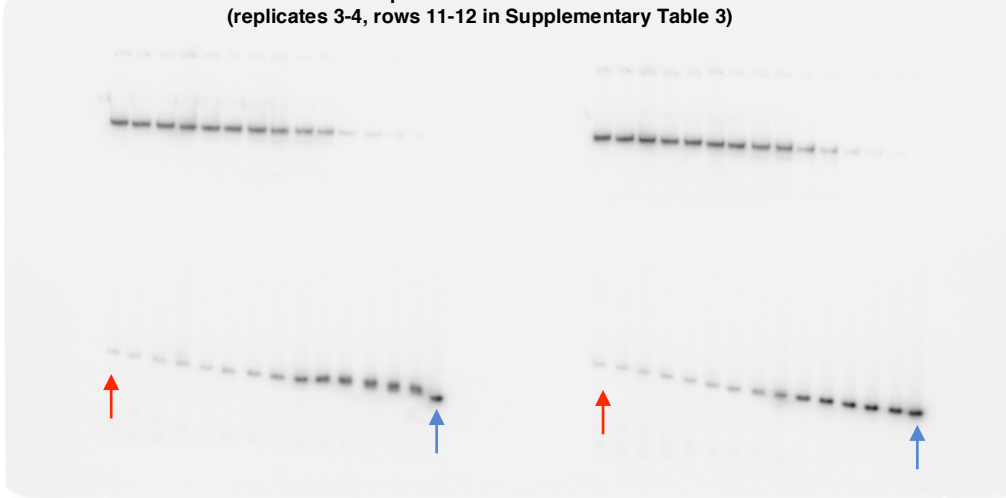

Gels used to infer p53 Kd for the two T-T mismatch site  
(replicates 5-6, rows 13-14 in Supplementary Table 3)

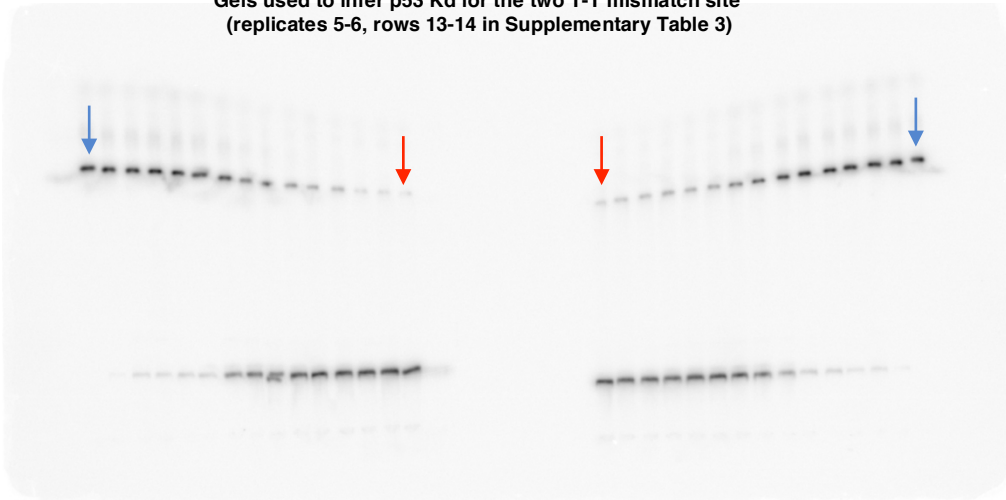

Gels used to infer p53 Kd for the two T-T mismatch site  
(replicates 1-2, rows 9-10 in Supplementary Table 3)

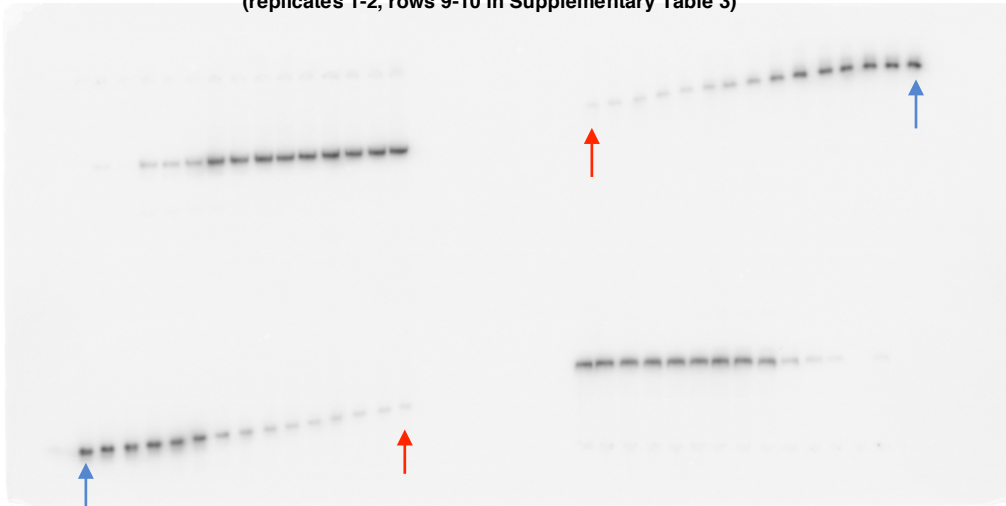

**p53 two T-T mismatch.**

Protein concentration: 0,0.4,0.8,2,4,8,16,24,32,40,60,80,120,160,240 [nM] (Blue arrow 0nM, and Red arrow 240nM)

Original high quality image scans:

[https://figshare.com/articles/figure/p53\\_EMSA\\_gels/12568691](https://figshare.com/articles/figure/p53_EMSA_gels/12568691)

File names: MM\_2xT.T\_CT20-2\_b1e2\_10.6.19.tif , MM\_2xT.T\_CT20-4\_b2e1\_14.7.19.tif , MM\_2xT.T&CT20-2\_b1e1\_4.6.19.tif

Gels used to infer p53 Kd for the C-T mismatch site  
(replicates 1-2, rows 33-34 in Supplementary Table 3)

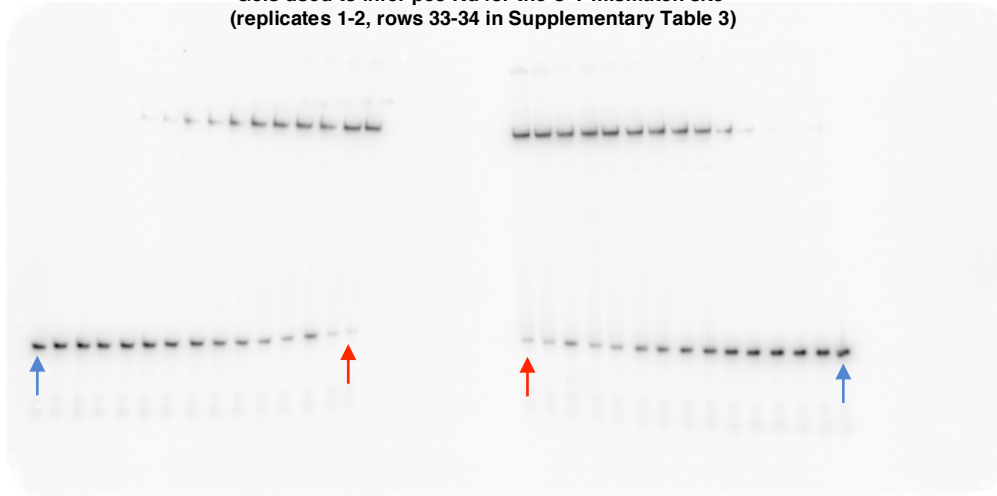

Gels used to infer p53 Kd for the C-T mismatch site  
(replicates 3-4, rows 35-36 in Supplementary Table 3)

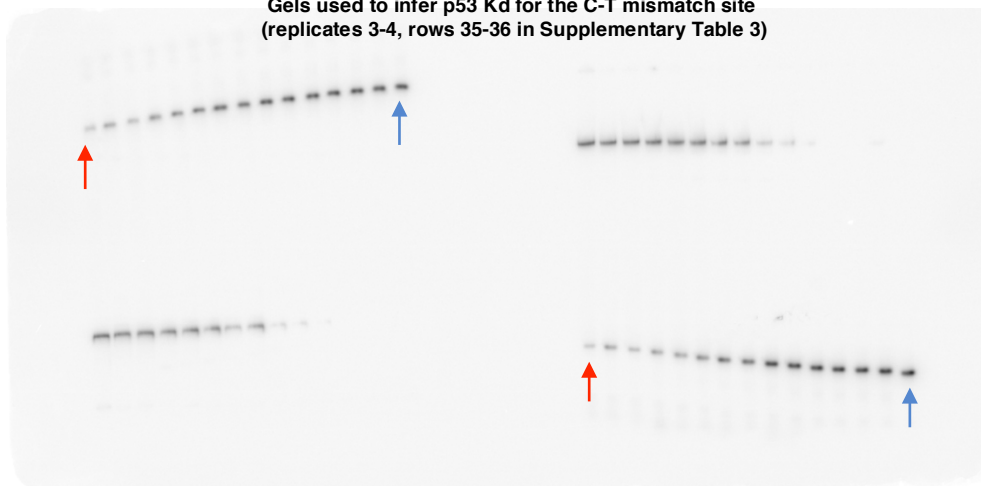

Gels used to infer p53 Kd for the C-T mismatch site  
(replicates 5-6, rows 37-38 in Supplementary Table 3)

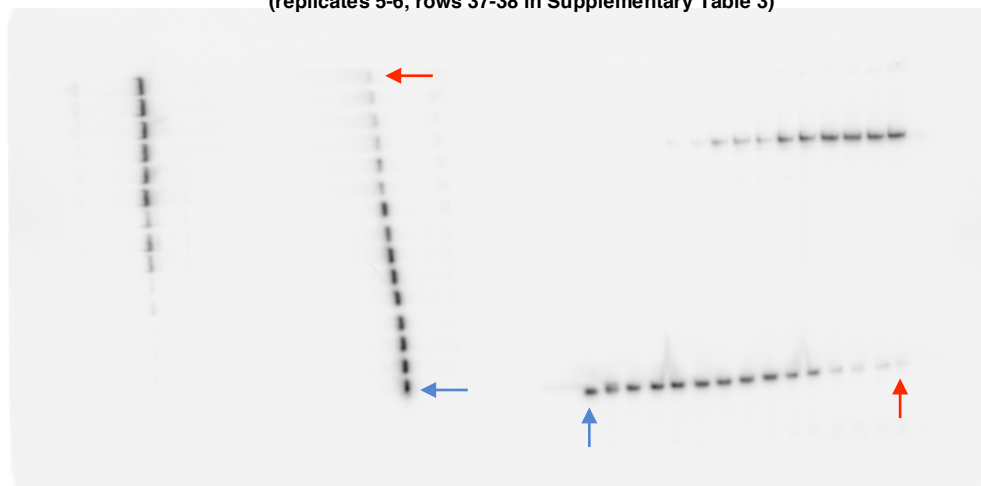

**p53 C-T mismatch.**

Protein concentration: 0,0.4,0.8,2,4,8,16,24,32,40,60,80,120,160,240 [nM] (Blue arrow 0nM, and Red arrow 240nM)

Original high quality image scans:

[https://figshare.com/articles/figure/p53\\_EMSA\\_gels/12568691](https://figshare.com/articles/figure/p53_EMSA_gels/12568691)

File names: MM\_C.T\_CT20-2\_b1e1\_18.4.19.tif , MM\_C.T\_CT20-2\_b1e2\_22.4.19.tif , MM\_C.T\_CT20-2\_b1e3\_23.4.19.tif

Gels used to infer p53 Kd for the C-T&T-C mismatch site  
(replicates 1-2, rows 27-28 in Supplementary Table 3)

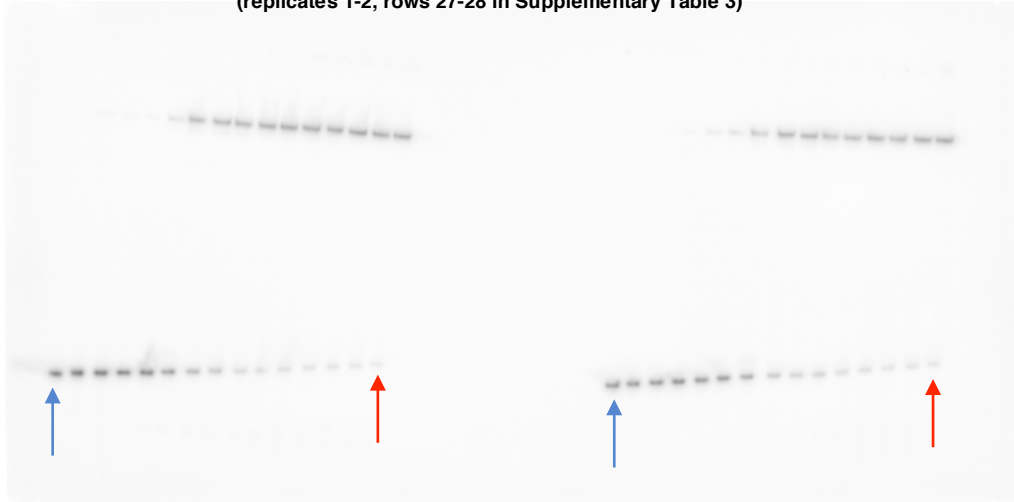

Gels used to infer p53 Kd for the C-T&T-C mismatch site  
(replicates 3-4, rows 29-30 in Supplementary Table 3)

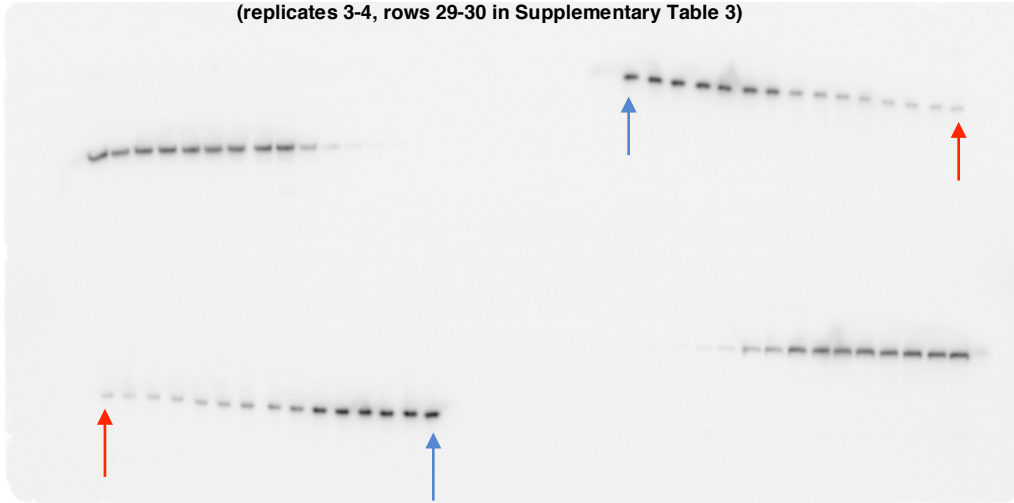

Gels used to infer p53 Kd for the C-T&T-C mismatch site  
(replicates 5-6, rows 31-32 in Supplementary Table 3)

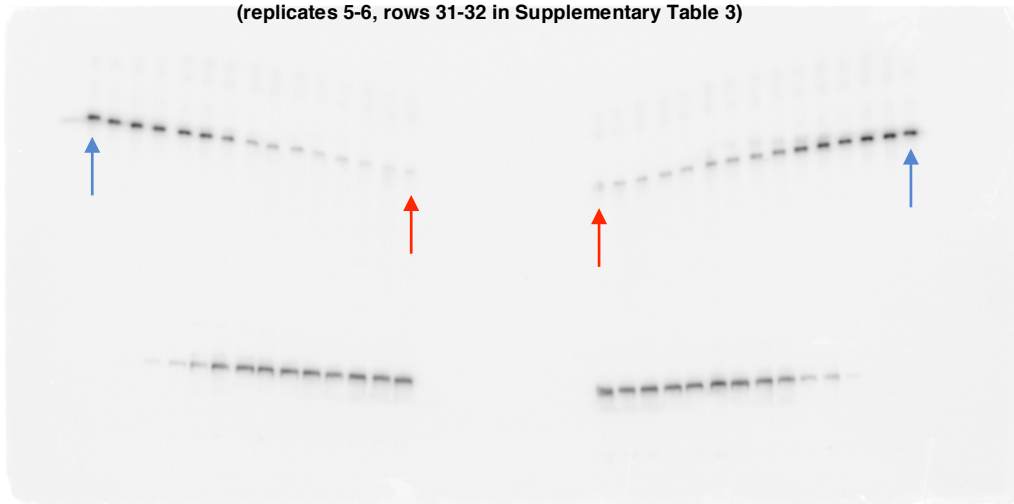

**p53 C-T & T-C mismatches.**

Protein concentration: 0,0.4,0.8,2,4,8,16,24,32,40,60,80,120,160,240 [nM] (Blue arrow 0nM, and Red arrow 240nM)

Original high quality image scans:

[https://figshare.com/articles/figure/p53\\_EMSA\\_gels/12568691](https://figshare.com/articles/figure/p53_EMSA_gels/12568691)

File names: MM\_C.T.T.C\_CT20-2\_b1e1\_6.6.19.tif , MM\_C.T.T.C\_CT20-2\_b1e2\_11.6.19.tif , MM\_C.T.T.C\_CT20-2\_b1e4\_19.6.19.tif



Gels used to infer p53 Kd for the G-T mismatch site  
(replicates 5-6, rows 55-56 in Supplementary Table 3)

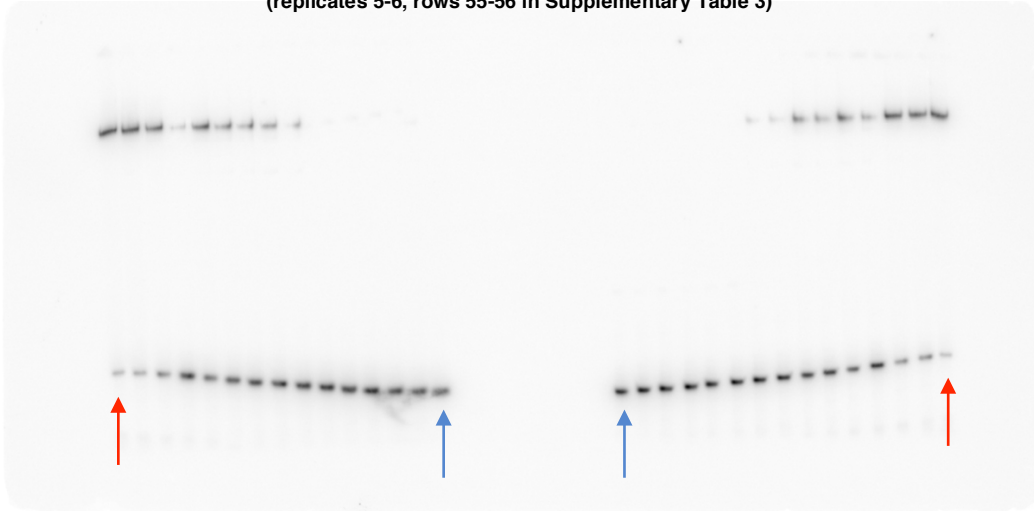

Gels used to infer p53 Kd for the G-T mismatch site  
(replicates 1-2, rows 51-52 in Supplementary Table 3)

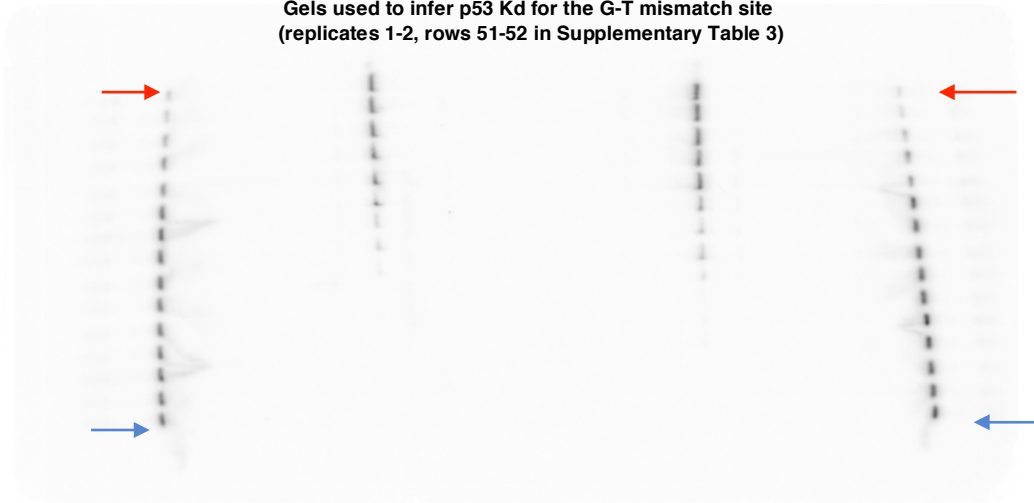

Gels used to infer p53 Kd for the G-T mismatch site  
(replicates 3-4, rows 53-54 in Supplementary Table 3)

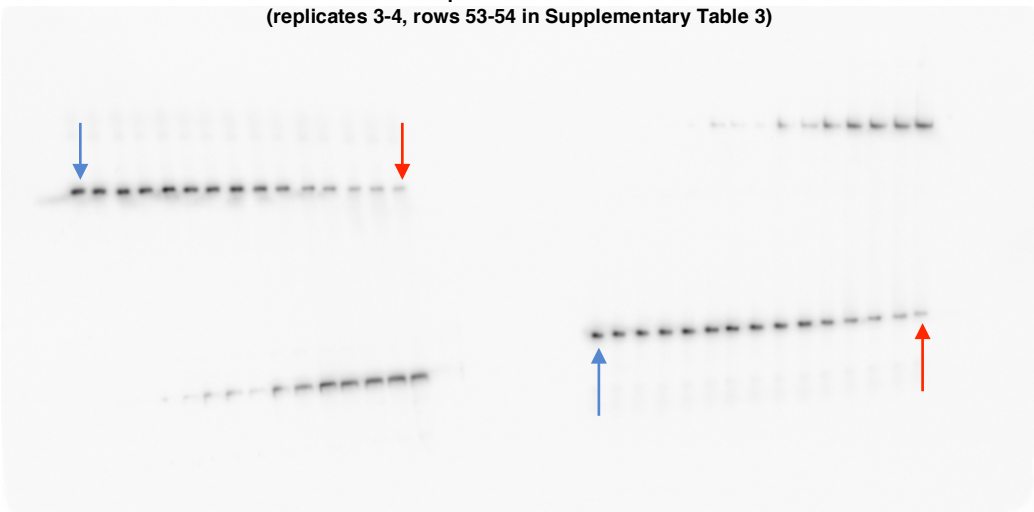

**p53 G-T mismatch**

Protein concentration: 0,0.4,0.8,2,4,8,16,24,32,40,60,80,120,160,240 [nM] (Blue arrow 0nM, and Red arrow 240nM)

Original high quality image scans:

[https://figshare.com/articles/figure/p53\\_EMSA\\_gels/12568691](https://figshare.com/articles/figure/p53_EMSA_gels/12568691)

File names: MM\_G.T\_CT20-2\_b1e3\_16.4.19.tif , MM-G.T\_CT20-1\_b1e1\_10.4.19.tif , MM-G.T\_CT20-2\_b1e2\_11.4.19.tif

Gels used to infer p53 Kd for the G-A mismatch site  
(replicates 1-2, rows 57-58 in Supplementary Table 3)

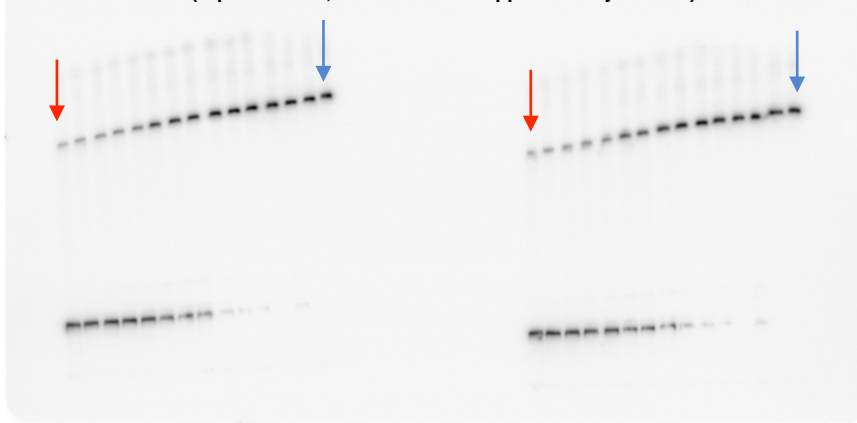

Gels used to infer p53 Kd for the G-A mismatch site  
(replicates 3-4, rows 59-60 in Supplementary Table 3)

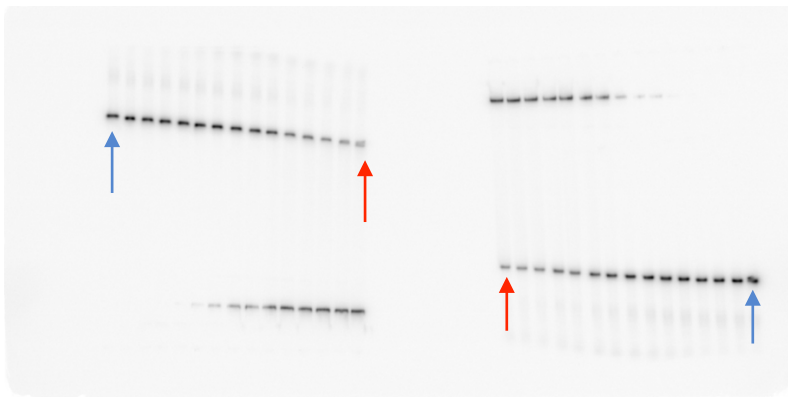

Gels used to infer p53 Kd for the G-A mismatch site  
(replicates 5-6, rows 61-62 in Supplementary Table 3)

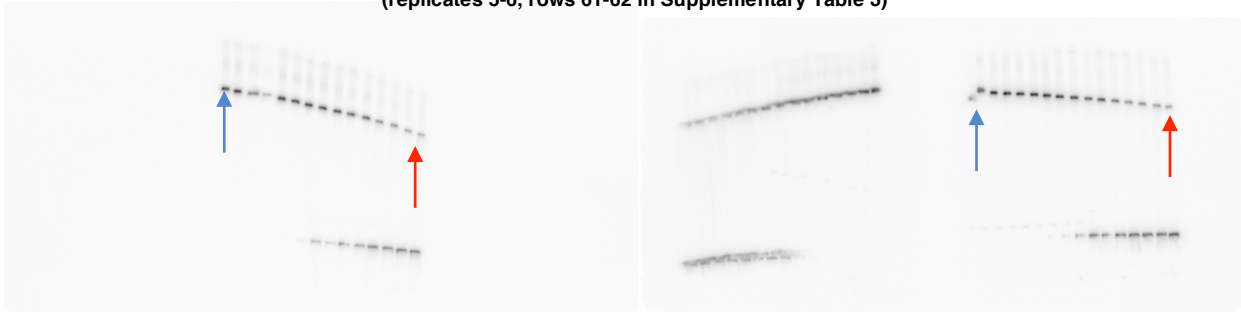

**p53 G-A mismatch.**

Protein concentration: 0,0.4,0.8,2,4,8,16,24,32,40,60,80,120,160,240 [nM] (Blue arrow 0nM, and Red arrow 240nM)

Original high quality image scans:

[https://figshare.com/articles/figure/p53\\_EMSA\\_gels/12568691](https://figshare.com/articles/figure/p53_EMSA_gels/12568691)

File names: MM\_G.A\_CT20-4\_b2e1\_16.7.19.tif , MM\_G.A\_CT20-4\_b2e2\_16.7.19.tif , MM\_G.A\_CT20-4\_b2e3\_17.7.19.tif, MM\_G.A\_CT20-4\_b2e4\_17.7.19.tif

Gel used to infer GR Kd for the G-T mismatch site  
(replicate 1, row 3 in Supplementary Table 3)

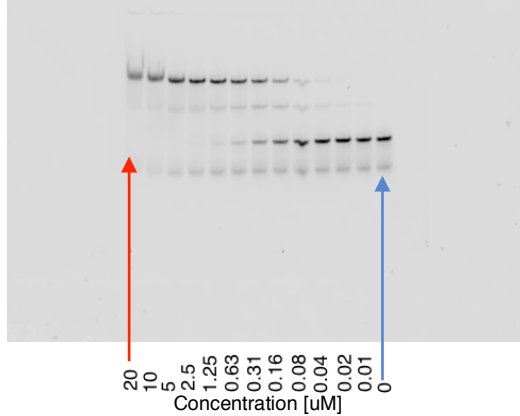

Gel used to infer GR Kd for the G-T mismatch site  
(replicate 2, row 4 in Supplementary Table 3)

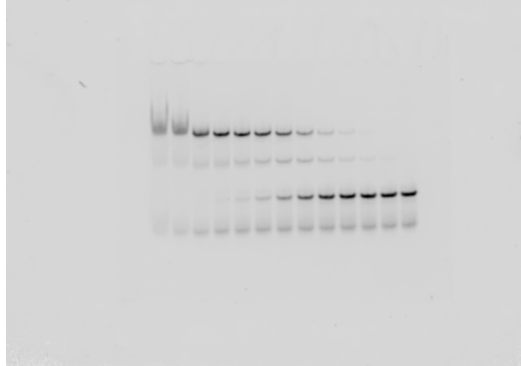

Gel used to infer GR Kd for the G-T mismatch site  
(replicate 3, row 5 in Supplementary Table 3)

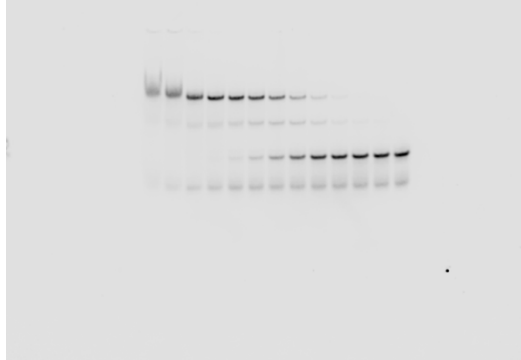

**GR MM1 (GT mismatch).**

Protein concentration: 20,10,5,2.5,1.25,0.63,0.31,0.16,0.08,0.04,0.02,0.01,0 [uM]

(Blue arrow 0uM, and Red arrow 20uM), Original high quality image scans:

[https://figshare.com/articles/figure/GR\\_EMSA\\_gels/12570236](https://figshare.com/articles/figure/GR_EMSA_gels/12570236)

File names: 07\_23\_19\_MM1\_2min\_700nm.tif,07\_26\_19\_MM1\_2min\_700nm.tif,07\_29\_19\_MM1\_2min\_700nm.tif.

Gel used to infer GR Kd for the T-T mismatch site  
(replicate 1, row 6 in Supplementary Table 3)

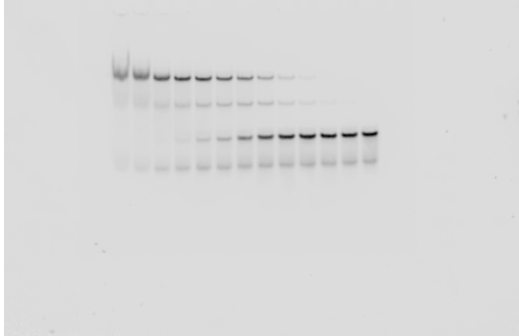

Gel used to infer GR Kd for the T-T mismatch site  
(replicate 2, row 7 in Supplementary Table 3)

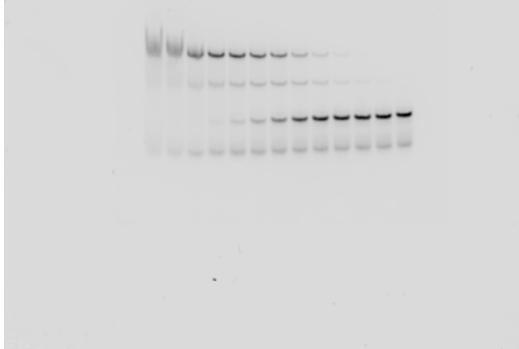

Gel used to infer GR Kd for the T-T mismatch site  
(replicate 3, row 8 in Supplementary Table 3)

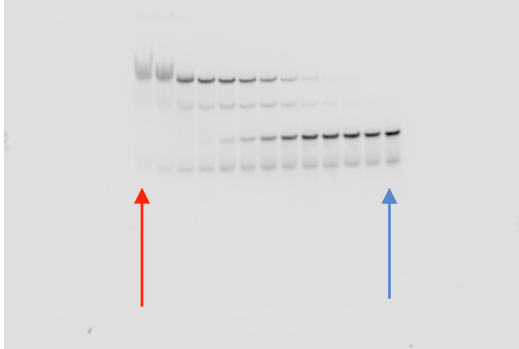

**GR MM2 (TT mismatch).**

Protein concentration: 20,10,5,2.5,1.25,0.63,0.31,0.16,0.08,0.04,0.02,0.01,0 [uM]

(Blue arrow 0uM, and Red arrow 20uM), Original high quality image scans:

[https://figshare.com/articles/figure/GR\\_EMSA\\_gels/12570236](https://figshare.com/articles/figure/GR_EMSA_gels/12570236)

File names:07\_23\_19\_MM2\_2min\_700nm.tif, 07\_26\_19\_MM2\_2min\_700nm.tif, 07\_29\_19\_MM2\_2min\_700nm.tif.

Gel used to infer GR Kd for the wild-type site  
(replicate 1, row 9 in Supplementary Table 3)

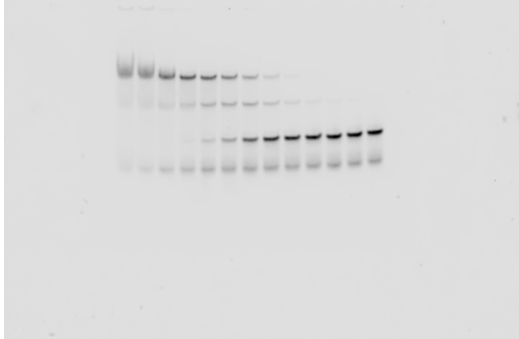

Gel used to infer GR Kd for the wild-type site  
(replicate 2, row 10 in Supplementary Table 3)

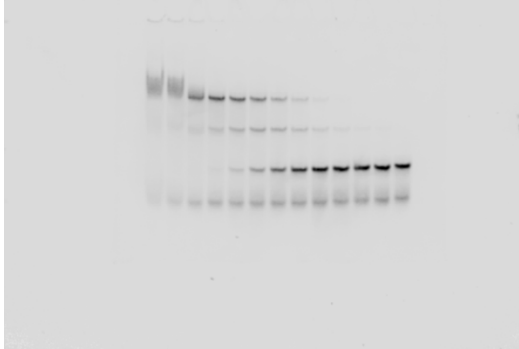

Gel used to infer GR Kd for the wild-type site  
(replicate 3, row 11 in Supplementary Table 3)

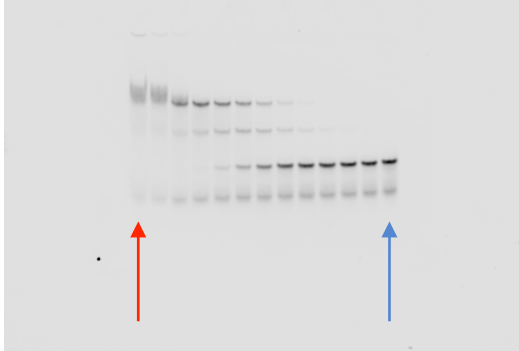

**GR MM3 (Wild-type).**

Protein concentration: 20,10,5,2.5,1.25,0.63,0.31,0.16,0.08,0.04,0.02,0.01,0 [uM]

(Blue arrow 0uM, and Red arrow 20uM), Original high quality image scans:

[https://figshare.com/articles/figure/GR\\_EMSA\\_gels/12570236](https://figshare.com/articles/figure/GR_EMSA_gels/12570236)

File names: 07\_23\_19\_MM3\_2min\_700nm.tif, 07\_26\_19\_MM3\_2min\_700nm.tif, 07\_29\_19\_MM3\_2min\_700nm.tif.

Gel used to infer GR Kd for the C-T mismatch site  
(replicate 1, row 12 in Supplementary Table 3)

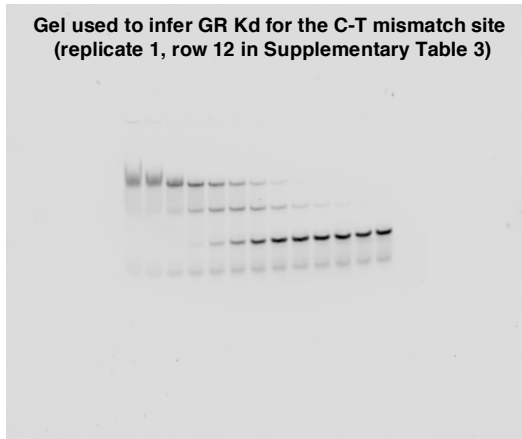

Gel used to infer GR Kd for the C-T mismatch site  
(replicate 2, row 13 in Supplementary Table 3)

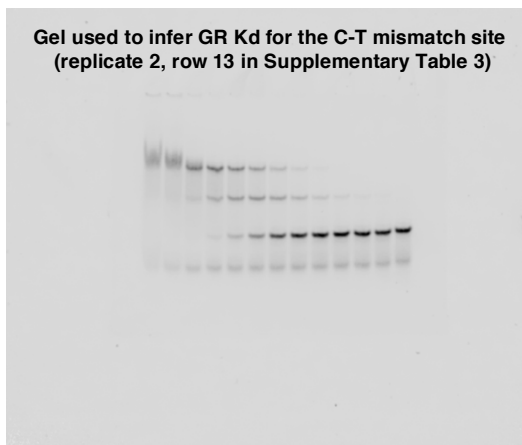

Gel used to infer GR Kd for the C-T mismatch site  
(replicate 3, row 14 in Supplementary Table 3)

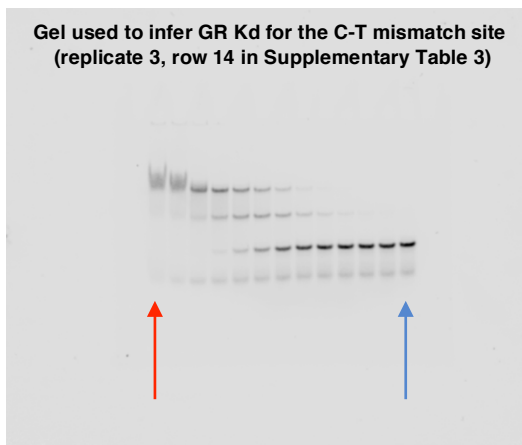

**GR MM4 (CT mismatch).**

Protein concentration: 20,10,5,2.5,1.25,0.63,0.31,0.16,0.08,0.04,0.02,0.01,0 [uM]

(Blue arrow 0uM, and Red arrow 20uM), Original high quality image scans:

[https://figshare.com/articles/figure/GR\\_EMSA\\_gels/12570236](https://figshare.com/articles/figure/GR_EMSA_gels/12570236)

File names: 07\_23\_19\_MM4\_2min\_700nm.tif, 07\_26\_19\_MM4\_2min\_700nm.tif, 07\_29\_19\_MM4\_2min\_700nm.tif.
